# Supplementary material
Source: PubMed Central journal article supplement (PMC4252608)

**Figure S4 - related to figure 5.** dCas9-SunTag can recruit many copies of scFv-GCN4-GFP to a genomic locus.

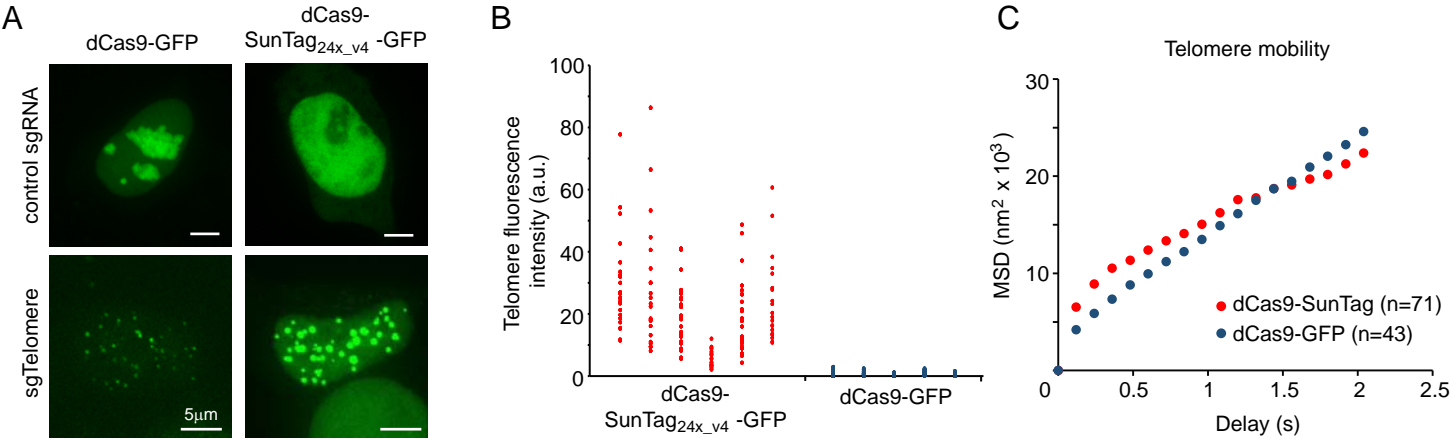

Supplement: NIHMS631449-supplement-Figure_S4.pdf [file NIHMS631449-supplement-Figure_S4.pdf]
